# Supplementary material for: Designing Versatile Superhydrophilic Structures via an Alginate-Based Hydrophilic Plasticene
Source: Micromachines (Basel). 2023 Apr 28;14(5):962. doi: 10.3390/mi14050962 (PMC10223521; doi:10.3390/mi14050962)
Supplement: Supplementary file 1 [file micromachines-14-00962-s001.zip]

Archive with 9 entries (9 files):
- Movie S1.mp4
- Movie S2.mp4
- Movie S3 .mp4
- Movie S4 .mp4
- Movie S5.mp4
- Movie S6.mp4
- Movie S7 .mp4
- Movie S8 .mp4
- Supplementary Materials.pdf
